# Supplementary material
Source: PubMed Central journal article supplement (PMC2754637)
Supplement: pp.109.139188_1.pdf [file pp.109.139188_1.pdf]

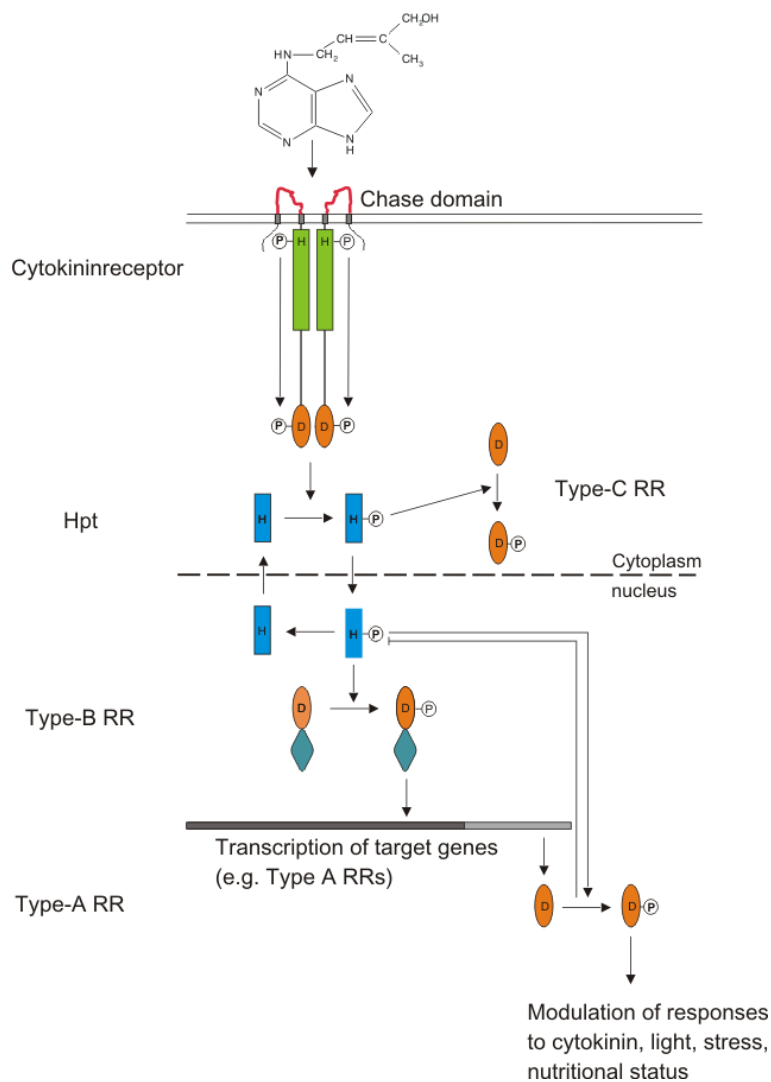

Supplemental figure 1: Model of the cytokinin signal transduction pathway. The model predicts that ligand binding induces autophosphorylation of the receptor and that the phosphoryl group is then transferred via an His-to-Asp-relay by phosphotransmitter proteins (AHPs) from the cytoplasm to type B RRs in the nucleus. Type-B RRs transcribe target genes, including the type-A *RR* genes. The model predicts that type-A RRs down regulate the primary cytokinin signal response via a negative feedback loop acting on AHPs. If the type C-RRs play a role in this signaling pathway is unclear. The structure AHK4 is shown as an example for a cytokinin receptor. Abbreviations: D, aspartate residue, H, histidine residue, P, phosphoryl group.
